# Supplementary material for: Integration of acetic acid catalysis with one-pot protic ionic liquid configuration to achieve high-efficient biorefinery of poplar biomass
Source: Royal Society of Chemistry journal article supplement (doi:10.1039/d1gc01727f), 2021-01-01
Supplement: d1gc01727f1.pdf [file d1gc01727f1.pdf]

*Supporting information*

**Integration of acetic acid catalysis with one-pot protic ionic liquid configuration to achieve high-efficient biorefinery of poplar biomass**

Kaixuan Huang<sup>a,b,c,e</sup>, Mood Mohan<sup>b,d</sup>, Anthe George<sup>b,d</sup>, Blake A. Simmons<sup>b,c</sup>, Yong Xu<sup>a,\*</sup>, John M. Gladden<sup>b,d,\*</sup>

<sup>a</sup> Key Laboratory of Forestry Genetics & Biotechnology (Nanjing Forestry University), Ministry of Education, Nanjing 210037, People's Republic of China

<sup>b</sup> Joint BioEnergy Institute, 5885 Hollis Street, Emeryville, California 94608, United States

<sup>c</sup> Biological Systems and Engineering Division, Lawrence Berkeley National Laboratory, 1 Cyclotron Road, Berkeley, California 94720, United States

<sup>d</sup> Biomass Science and Conversion Technology, Sandia National Laboratories, 7011 East Avenue, Livermore, California 94551, United States

<sup>e</sup> College of Marine and Bio-engineering, Yancheng Teachers University, Yancheng, Jiangsu 224002, People's Republic of China

□ Corresponding authors.

E-mail addresses: xuyong@njfu.edu.cn (Y. Xu), jmgladden@lbl.gov (J. Gladden).

**Table S1:** Favorability of proton transfer between acetic acid and ethanolamine and interaction energies between molecular species of acid and base and ionic species of anion and cation of IL computed by quantum chemical calculations at B3LYP-GD3BJ/6-311+G(d,p) level of theory.

| Type                                       | Chemical structure                                                                  | $\Delta E_{reaction}$<br>(kcal/mol) | Interaction<br>energies (kcal/mol) |
|--------------------------------------------|-------------------------------------------------------------------------------------|-------------------------------------|------------------------------------|
| Neutral species (HAc + EOA)<br>Conformer 1 | 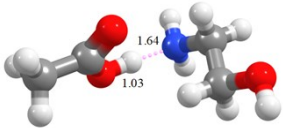   | 0.98                                | -14.98                             |
| Ionic Species ([EOA][OAc])<br>Conformer 1  |    |                                     | -132.84                            |
| Neutral species (HAc + EOA)<br>Conformer 2 |    | -1.68                               | -22.73                             |
| Ionic Species ([EOA][OAc])<br>Conformer 2  |   |                                     | -139.39                            |
| [C <sub>2</sub> C <sub>1</sub> Im][OAc]    |  | -                                   | -101.65                            |
| [C <sub>4</sub> C <sub>1</sub> Im][OAc]    |  | -                                   | -100.67                            |

Proton Affinity of acetic acid is 342.33 kcal/mol and ethanolamine is 220.87 kcal/mol; Favorability of proton transfer calculated as:  $\Delta E_{reaction} = E_{ionic} - E_{neutral}$

**Fig. S1** Synthesis and characterization of ethanolamine acetate ([EOA][OAc]). (A) [EOA][OAc] formation from ethanolamine and acetic acid. (B) NMR spectrum of [EOA][OAc]. (C) DSC and TGA spectrum of [EOA][OAc].

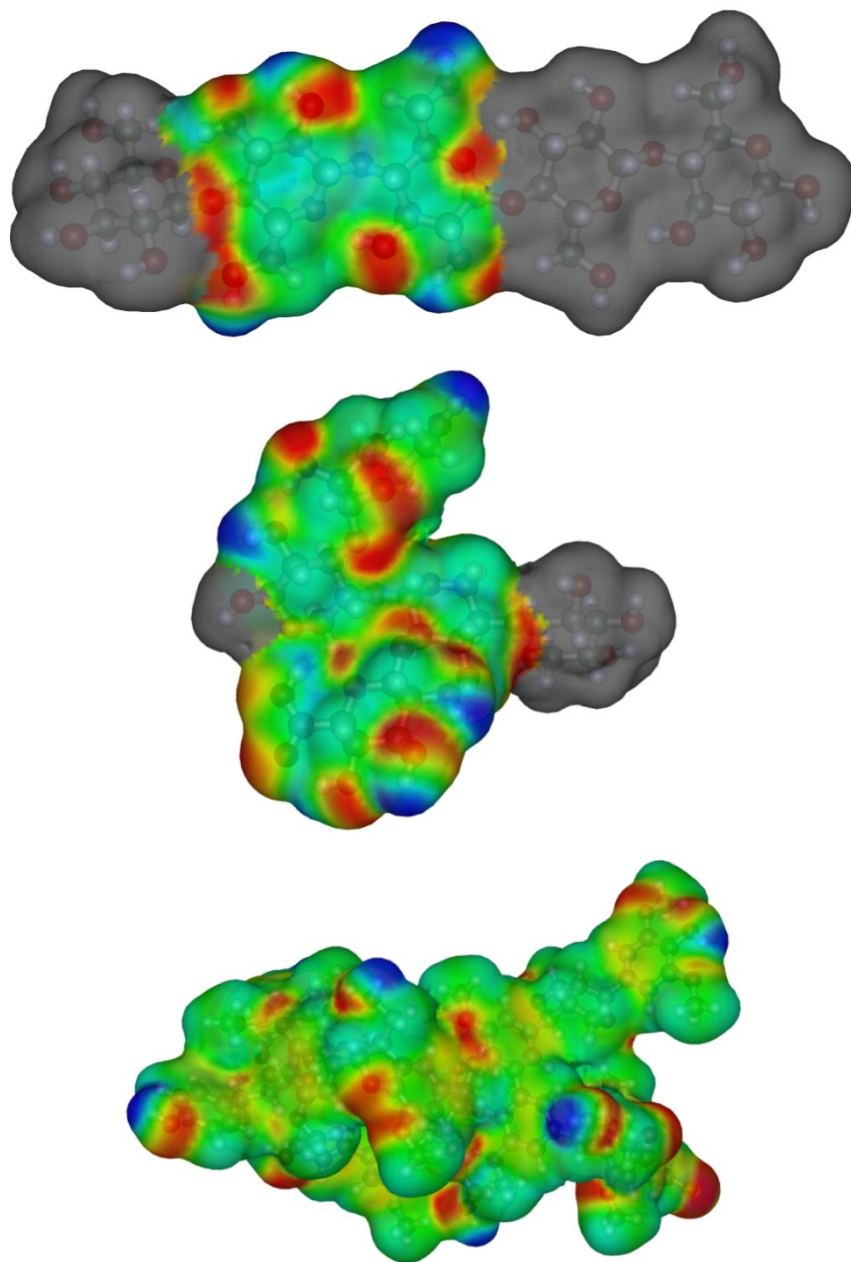

**Fig. S2** COSMO-RS charge surface of cellulose (mid-dimer of cellopentoase), hemicellulose, and lignin. Here the extent of screening charge varies from  $-0.03 \text{ e}/\text{\AA}^2$  (red: polar region) to  $+0.03 \text{ e}/\text{\AA}^2$  (blue: polar region). Red color indicates positive surface screening charges resulting from negative

partial charges within molecule, blue color indicates negative surface charges resulting from positive partial charges, and green color represents neutral charges (non-polar region)

Cartesian coordinates (in Å) of isolated molecules of neutral and ionic species optimized at B3LYP-GD3BJ/6-311+g(d,p) level of theory and basis set.

Acetic acid ([HAc])  
Energy: -229.104667

|   |          |          |          |
|---|----------|----------|----------|
| C | -0.51636 | 0.28023  | 0.00000  |
| O | -1.05453 | 1.35820  | 0.00000  |
| O | -1.21930 | -0.88248 | 0.00000  |
| H | -2.15937 | -0.64710 | 0.00000  |
| C | 0.96638  | 0.02788  | 0.00000  |
| H | 1.49763  | 0.97677  | -0.00001 |
| H | 1.24277  | -0.55675 | -0.88043 |
| H | 1.24277  | -0.55674 | 0.88043  |

Acetate [[OAc]<sup>-</sup>]  
Energy: -228.555355

|   |          |          |          |
|---|----------|----------|----------|
| C | -0.90160 | 0.00001  | -0.01738 |
| C | 0.66320  | -0.00002 | -0.01162 |
| O | -1.44294 | -1.13300 | -0.00481 |
| O | -1.44290 | 1.13304  | -0.00481 |
| H | 1.05862  | -0.89809 | -0.49569 |
| H | 1.05863  | 0.89790  | -0.49598 |
| H | 1.00699  | 0.00017  | 1.03026  |

Ethanolamine ([EOA])  
Energy: -210.365070

|   |          |          |          |
|---|----------|----------|----------|
| N | -1.65818 | 0.16355  | -0.08231 |
| C | 0.77176  | 0.44119  | -0.09415 |
| C | -0.37942 | -0.55135 | -0.00736 |
| O | 1.98995  | -0.29308 | 0.03859  |
| H | -2.42357 | -0.47410 | -0.26687 |
| H | -1.86621 | 0.63926  | 0.78958  |
| H | 0.72328  | 0.96922  | -1.05363 |
| H | 0.67839  | 1.18684  | 0.70901  |
| H | -0.25233 | -1.15461 | 0.90301  |
| H | -0.31468 | -1.23474 | -0.85806 |
| H | 2.73099  | 0.30781  | -0.07783 |

Ethanolammonium ([EOA]<sup>+</sup>)  
Energy: -210.706082

|   |          |          |          |
|---|----------|----------|----------|
| N | 1.21601  | 0.96131  | 0.00000  |
| C | -0.44090 | -0.92762 | 0.00000  |
| C | -0.25883 | 0.58868  | 0.00000  |
| O | -1.83663 | -1.09409 | 0.00000  |
| H | 1.34035  | 1.97838  | 0.00000  |
| H | 1.69744  | 0.59279  | 0.82679  |
| H | 1.69744  | 0.59279  | -0.82679 |
| H | 0.02972  | -1.36656 | -0.89213 |
| H | 0.02972  | -1.36656 | 0.89213  |
| H | -0.70271 | 1.03514  | 0.88929  |
| H | -0.70271 | 1.03514  | -0.88929 |
| H | -2.06889 | -2.02940 | 0.00000  |

Water

Energy: -76.433974

|   |         |          |          |
|---|---------|----------|----------|
| O | 0.00000 | -0.00000 | 0.39017  |
| H | 0.00000 | 0.76357  | -0.19509 |
| H | 0.00000 | -0.76357 | -0.19509 |

Cartesian coordinates (in Å) and calculated lowest energy conformers of lignin-amine/organic solvent complexes optimized at B3LYP-GD3BJ/6-311+g(d,p) level of theory and basis set.

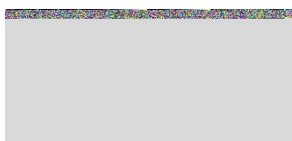

EthA-Ace\_Ethanol-React-Conf1  
 -439.650221969  
 -439.477162  
 Neutral species (HAc + EOA)  
 Conformer 1  
 19  
 Energy: -439.477162  
 I.E. (kcal/mol) = -14.98

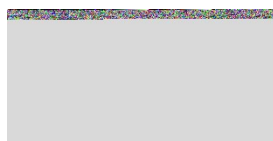

EOA-Ace\_React-New-Conf2  
 -439.656192288  
 -439.483297  
 Neutral species (HAc + EOA)  
 Conformer 2  
 19  
 Energy: -439.483297  
 I.E. (kcal/mol) = -132.84

|   |          |          |          |
|---|----------|----------|----------|
| N | -0.93758 | 1.70667  | -0.05322 |
| C | -1.96898 | -0.43355 | 0.55686  |
| C | -1.83834 | 0.63284  | -0.51634 |
| O | -2.87406 | -1.42471 | 0.06422  |
| H | -0.81753 | 2.39485  | -0.79059 |
| H | -1.35393 | 2.20494  | 0.72942  |
| H | 0.55239  | 1.14766  | 0.33383  |
| H | -0.98930 | -0.87479 | 0.76689  |
| H | -2.35329 | 0.00775  | 1.48561  |
| H | -2.83264 | 1.01265  | -0.77582 |
| H | -1.39779 | 0.18965  | -1.41062 |
| H | -2.94391 | -2.13669 | 0.71097  |
| C | 1.93046  | -0.16816 | -0.13259 |
| C | 3.29881  | -0.64996 | 0.27641  |
| H | 4.01562  | 0.17292  | 0.22703  |
| H | 3.27675  | -0.99797 | 1.31186  |
| H | 3.62696  | -1.45940 | -0.37252 |
| O | 1.49172  | 0.83139  | 0.62304  |
| O | 1.28834  | -0.64359 | -1.05596 |

|   |          |          |          |
|---|----------|----------|----------|
| N | 1.28262  | 1.47664  | -0.17978 |
| C | 2.44149  | -0.71962 | -0.02728 |
| C | 2.02183  | 0.54802  | 0.70360  |
| O | 1.37613  | -1.37975 | -0.69982 |
| H | 1.27321  | 2.40534  | 0.23287  |
| H | 1.75807  | 1.56955  | -1.07395 |
| H | -0.25401 | 1.11250  | -0.36064 |
| H | 2.92018  | -1.38876 | 0.69971  |
| H | 3.18641  | -0.48207 | -0.79270 |
| H | 2.92273  | 1.01389  | 1.11817  |
| H | 1.36669  | 0.29845  | 1.54284  |
| H | 0.56320  | -1.32551 | -0.16250 |
| C | -1.78464 | -0.08296 | 0.07597  |
| C | -3.28795 | -0.14487 | 0.04149  |
| H | -3.70727 | 0.69419  | 0.60136  |
| H | -3.63897 | -0.05389 | -0.98894 |
| H | -3.64128 | -1.08170 | 0.46681  |
| O | -1.29549 | 1.02493  | -0.44111 |
| O | -1.08960 | -0.98292 | 0.54251  |



EthA-Ace\_Ethanol-Prod-Conf1

-439.649768543

-439.475600

Ionic Species ([EOA][OAc])

Conformer 1

19

Energy: -439.475600

I.E. (kcal/mol) = -22.73

|   |          |          |          |
|---|----------|----------|----------|
| N | 0.87741  | 1.69518  | -0.02866 |
| C | 1.94571  | -0.46675 | -0.55182 |
| C | 1.73102  | 0.59730  | 0.51053  |
| O | 2.78864  | -1.45184 | 0.04043  |
| H | 0.70322  | 2.39804  | 0.68685  |
| H | 1.32042  | 2.17113  | -0.81347 |
| H | -0.09582 | 1.30342  | -0.35492 |
| H | 0.98430  | -0.89694 | -0.84900 |
| H | 2.42107  | -0.03285 | -1.44032 |
| H | 2.68215  | 1.01555  | 0.83912  |
| H | 1.19733  | 0.17672  | 1.36003  |
| H | 2.90292  | -2.18297 | -0.57814 |
| C | -1.87227 | -0.08488 | 0.10007  |
| C | -3.17068 | -0.80705 | -0.24166 |
| H | -3.93632 | -0.08579 | -0.53871 |
| H | -3.00895 | -1.47149 | -1.09524 |
| H | -3.53565 | -1.39426 | 0.60080  |
| O | -1.40805 | 0.68595  | -0.81335 |
| O | -1.32799 | -0.27143 | 1.20804  |



EOA-Ace\_Prod-New-Conf2

-439.660907913

-439.485982

Ionic Species ([EOA][OAc])

Conformer 2

19

Energy: -439.485982

I.E. (kcal/mol) = -139.39

|   |          |          |          |
|---|----------|----------|----------|
| N | 1.38494  | 1.46881  | -0.23792 |
| C | 2.31757  | -0.80324 | 0.13595  |
| C | 1.93528  | 0.52281  | 0.78661  |
| O | 1.33348  | -1.28291 | -0.75793 |
| H | 1.42181  | 2.43121  | 0.09243  |
| H | 1.90335  | 1.42307  | -1.11399 |
| H | 0.35262  | 1.23507  | -0.42662 |
| H | 2.53105  | -1.51957 | 0.93955  |
| H | 3.23524  | -0.67998 | -0.44511 |
| H | 2.80210  | 0.98016  | 1.26309  |
| H | 1.15104  | 0.39357  | 1.53196  |
| H | 0.44183  | -1.27686 | -0.32360 |
| C | -1.75123 | -0.05674 | -0.00223 |
| C | -3.26016 | -0.02641 | 0.19578  |
| H | -3.50464 | 0.66791  | 1.00504  |
| H | -3.75272 | 0.34514  | -0.70553 |
| H | -3.65243 | -1.01127 | 0.44738  |
| O | -1.21761 | 1.00343  | -0.45589 |
| O | -1.12494 | -1.10660 | 0.30184  |



EMIM-Ace-4

Energy: -573.397700765

-573.165549

[C<sub>2</sub>C<sub>1</sub>Im][OAc]-Conformer 1

26

Energy: -573.165549

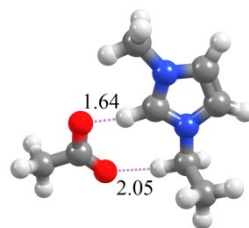

EMIM-Ace-3

Energy: -573.397537013

-573.165323

[C<sub>2</sub>C<sub>1</sub>Im][OAc]-Conformer 2

26

Energy: -573.165323

I.E. (kcal/mol) = -104.95

I.E. (kcal/mol) =

|   |          |          |          |   |          |          |          |
|---|----------|----------|----------|---|----------|----------|----------|
| C | -0.56754 | 0.30374  | 0.12323  | C | -0.67942 | -0.43910 | -0.02970 |
| N | -0.89538 | 1.59044  | -0.04142 | N | -1.58044 | -1.42900 | 0.04625  |
| C | -2.27234 | 1.72226  | 0.02813  | C | -2.85065 | -0.91144 | -0.14498 |
| C | -2.78215 | 0.47893  | 0.23850  | C | -2.69928 | 0.42642  | -0.33876 |
| N | -1.70319 | -0.38744 | 0.29657  | N | -1.34303 | 0.69815  | -0.26559 |
| C | 0.08055  | 2.67080  | -0.25387 | C | -1.22096 | -2.82857 | 0.28773  |
| C | -1.74050 | -1.84952 | 0.48431  | C | -0.69501 | 2.02255  | -0.40347 |
| C | -2.24972 | -2.58295 | -0.75325 | C | -0.95544 | 2.91370  | 0.80658  |
| H | -2.76353 | 2.67490  | -0.07180 | H | -3.73444 | -1.52583 | -0.13195 |
| H | -3.79968 | 0.14790  | 0.35467  | H | -3.43092 | 1.19337  | -0.52561 |
| H | 1.07847  | 2.21608  | -0.25504 | H | -1.56228 | -3.44713 | -0.54329 |
| H | -0.12240 | 3.15382  | -1.21075 | H | -0.13584 | -2.88548 | 0.36601  |
| H | -0.00828 | 3.39833  | 0.55419  | H | -1.67653 | -3.17403 | 1.21673  |
| H | -2.36762 | -2.05438 | 1.35513  | H | -1.07891 | 2.47240  | -1.32223 |
| H | -0.71825 | -2.14766 | 0.72005  | H | 0.37542  | 1.81673  | -0.51720 |
| H | -2.24809 | -3.65860 | -0.56274 | H | -0.45253 | 3.87167  | 0.65676  |
| H | -1.60171 | -2.38941 | -1.61035 | H | -0.54700 | 2.46083  | 1.71262  |
| H | -3.27012 | -2.28760 | -1.01104 | H | -2.02043 | 3.11091  | 0.96114  |
| H | 0.46293  | -0.17215 | 0.13032  | H | 0.43803  | -0.60508 | 0.07176  |
| H | 4.92963  | -0.14678 | -0.16989 | H | 4.73874  | 0.58460  | -0.22215 |
| O | 2.64559  | 0.93703  | -0.17292 | O | 1.97394  | -1.15159 | 0.20934  |
| C | 2.76796  | -0.29626 | 0.01411  | C | 2.69228  | -0.13197 | -0.05473 |
| C | 4.17174  | -0.90301 | 0.03492  | C | 4.20653  | -0.34395 | -0.01533 |
| O | 1.80126  | -1.10714 | 0.19616  | O | 2.24815  | 1.00489  | -0.33976 |
| H | 4.35841  | -1.35346 | 1.01407  | H | 4.49848  | -0.72862 | 0.96568  |
| H | 4.23739  | -1.70506 | -0.70532 | H | 4.48752  | -1.10053 | -0.75359 |

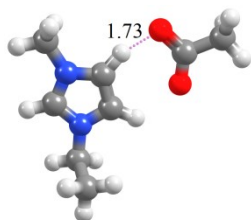

EMIM-Ace-2

Energy: -573.377019020

-573.144813

[C<sub>2</sub>C<sub>1</sub>Im][OAc]-Conformer 3  
26

Energy: -573.144813

I.E. (kcal/mol) = -90.95

|   |          |         |          |
|---|----------|---------|----------|
| C | -2.22225 | 0.98490 | -0.14701 |
| N | -1.06913 | 1.64772 | 0.01859  |
| C | -0.01319 | 0.75635 | -0.04150 |

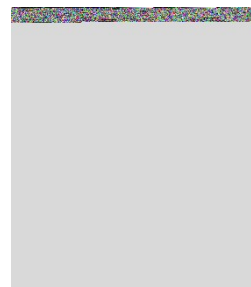

BMIM-Ace

Energy: -652.046858844

-651.755225

[C<sub>4</sub>C<sub>1</sub>Im][OAc]-Conformer 1  
32

Energy: -651.755225

I.E. (kcal/mol) = -104.08

|   |          |         |          |
|---|----------|---------|----------|
| C | -0.54677 | 0.91820 | -0.20081 |
| N | -1.14163 | 2.05352 | 0.18308  |

|   |          |          |          |   |          |          |          |
|---|----------|----------|----------|---|----------|----------|----------|
| C | -0.56261 | -0.47328 | -0.24839 | C | -0.22239 | 3.08824  | 0.13431  |
| N | -1.93649 | -0.31356 | -0.31379 | C | 0.95588  | 2.55544  | -0.28788 |
| C | -0.92939 | 3.09037  | 0.21758  | N | 0.72986  | 1.20487  | -0.49332 |
| C | -2.91939 | -1.39399 | -0.49082 | C | -2.55486 | 2.15248  | 0.57978  |
| C | -3.03705 | -2.28169 | 0.74563  | C | 1.71055  | 0.18773  | -0.91148 |
| H | 1.07413  | 0.99388  | 0.06041  | C | 2.65710  | -0.21725 | 0.22034  |
| H | -0.02711 | -1.40527 | -0.34725 | H | -0.48240 | 4.09953  | 0.39587  |
| H | -0.36501 | 3.51901  | -0.61040 | H | 1.91319  | 3.01585  | -0.46103 |
| H | -1.91703 | 3.54747  | 0.26450  | H | -3.08065 | 2.80317  | -0.12059 |
| H | -0.39469 | 3.27552  | 1.14869  | H | -2.97419 | 1.13953  | 0.55580  |
| H | -2.60668 | -1.97417 | -1.36103 | H | -2.61467 | 2.56758  | 1.58674  |
| H | -3.87521 | -0.92573 | -0.73298 | H | 2.26254  | 0.58927  | -1.76534 |
| H | -3.76724 | -3.07242 | 0.55830  | H | 1.12952  | -0.67129 | -1.25084 |
| H | -3.36747 | -1.70680 | 1.61374  | C | 3.64380  | -1.30354 | -0.22299 |
| H | -2.08157 | -2.75129 | 0.98583  | H | 2.05902  | -0.58212 | 1.06186  |
| H | -3.20819 | 1.41769  | -0.15032 | H | 3.20898  | 0.66103  | 0.57652  |
| H | 4.99337  | -0.48436 | -0.88022 | H | -0.98600 | -0.12411 | -0.27294 |
| O | 2.79131  | 0.81401  | 0.16039  | H | -2.55002 | -3.89578 | 0.54266  |
| C | 3.03364  | -0.42389 | 0.01464  | O | -3.24669 | -0.85932 | 0.37305  |
| C | 4.51402  | -0.82842 | 0.04202  | C | -2.54558 | -1.81573 | -0.03352 |
| O | 2.17734  | -1.32729 | -0.16362 | C | -3.15768 | -3.21735 | -0.06267 |
| H | 5.02471  | -0.33752 | 0.87413  | O | -1.33975 | -1.71916 | -0.43462 |
| H | 4.62537  | -1.91107 | 0.11590  | H | -4.18167 | -3.20679 | 0.31087  |
|   |          |          |          | H | -3.14322 | -3.60065 | -1.08692 |
|   |          |          |          | H | 4.22859  | -0.94033 | -1.07701 |
|   |          |          |          | H | 3.08107  | -2.17257 | -0.58107 |
|   |          |          |          | C | 4.59225  | -1.73510 | 0.89890  |
|   |          |          |          | H | 5.19469  | -0.89426 | 1.25673  |
|   |          |          |          | H | 5.27880  | -2.51344 | 0.55662  |
|   |          |          |          | H | 4.03658  | -2.13431 | 1.75241  |

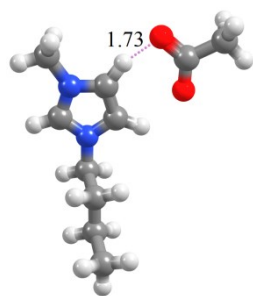

BMIM-Ace-2

Energy: -652.026212225

-651.734571

[C<sub>4</sub>C<sub>1</sub>Im][OAc]-Conformer 1

32

Energy: -651.734571

I.E. (kcal/mol) = -90.05



|   |          |          |          |
|---|----------|----------|----------|
| C | -0.76361 | 2.10503  | -0.18268 |
| N | 0.53371  | 2.20151  | 0.14078  |
| C | 1.13635  | 0.96464  | -0.00082 |
| C | 0.16108  | 0.11047  | -0.42024 |
| N | -1.01338 | 0.83554  | -0.53087 |
| C | 1.22426  | 3.41971  | 0.56387  |
| C | -2.32495 | 0.29107  | -0.91105 |
| C | -2.97325 | -0.52290 | 0.21160  |
| H | 2.20781  | 0.71349  | 0.19055  |
| H | 0.27842  | -0.94112 | -0.63339 |
| H | 2.00367  | 3.66559  | -0.15714 |
| H | 0.50922  | 4.23916  | 0.62537  |
| H | 1.67916  | 3.25544  | 1.54025  |
| H | -2.17197 | -0.32542 | -1.79949 |
| H | -2.95859 | 1.13276  | -1.20005 |
| C | -4.32482 | -1.10986 | -0.21195 |
| H | -3.10323 | 0.11814  | 1.09103  |
| H | -2.29446 | -1.32895 | 0.50806  |
| H | -1.48191 | 2.90710  | -0.17034 |
| H | 5.38723  | -2.03239 | -0.58015 |
| O | 3.68375  | -0.18205 | 0.34487  |
| C | 3.41603  | -1.38114 | 0.02423  |
| C | 4.58885  | -2.36971 | 0.08729  |
| O | 2.29206  | -1.81606 | -0.33413 |
| H | 5.00233  | -2.38351 | 1.09989  |
| H | 4.27462  | -3.37519 | -0.19548 |
| H | -4.18231 | -1.74706 | -1.09247 |
| H | -4.99414 | -0.29892 | -0.52465 |
| C | -4.99197 | -1.92105 | 0.90215  |
| H | -4.36232 | -2.76010 | 1.21159  |
| H | -5.95046 | -2.32850 | 0.57169  |
| H | -5.17964 | -1.30255 | 1.78499  |

Cartesian coordinates (in Å) of cellulose, hemicellulose, and lignin optimized at B3LYP-GD3BJ/6-311+g(d,p) level of theory and basis set.

Cellulose

Energy:

|   |          |          |          |
|---|----------|----------|----------|
| O | -3.97005 | -0.78334 | -0.38733 |
| C | -3.45387 | 0.42223  | 0.20636  |
| C | -6.31021 | -0.17228 | -0.00392 |
| C | -5.22365 | -1.25842 | 0.13154  |
| O | -6.67309 | 2.25136  | 0.13739  |
| O | -3.94836 | 2.73719  | 0.53099  |
| C | -5.49482 | -2.52089 | -0.69081 |
| O | -2.24280 | 0.71044  | -0.39844 |
| C | -4.43229 | 1.55367  | -0.07879 |
| C | -5.80185 | 1.18948  | 0.48500  |
| O | -6.78000 | -3.01717 | -0.37297 |
| O | 1.30602  | 0.68012  | 0.41922  |
| C | 1.75025  | -0.47701 | -0.30127 |
| C | -1.04432 | 0.17430  | 0.17742  |
| C | 0.06347  | 1.21699  | -0.03754 |
| O | -1.53561 | -2.20862 | -0.19705 |
| O | 1.13829  | -2.73048 | -0.83878 |
| C | -0.16717 | 2.50971  | 0.72388  |
| O | 2.97423  | -0.85889 | 0.21795  |
| C | 0.74242  | -1.60237 | -0.08026 |
| C | -0.65391 | -1.14181 | -0.50361 |
| O | 0.87672  | 3.40035  | 0.34376  |
| O | 6.53377  | -0.80660 | -0.49354 |
| C | 6.94010  | 0.41264  | 0.14493  |
| C | 4.15971  | -0.31359 | -0.37446 |
| C | 5.27922  | -1.31421 | -0.04310 |
| O | 3.67176  | 2.11332  | -0.29210 |
| O | 6.27362  | 2.69683  | 0.45365  |
| C | 5.08583  | -2.66428 | -0.71066 |

|   |           |          |          |
|---|-----------|----------|----------|
| O | 8.17815   | 0.76621  | -0.35917 |
| C | 5.92935   | 1.49669  | -0.21284 |
| C | 4.50972   | 1.07363  | 0.18409  |
| O | 6.10420   | -3.52414 | -0.20797 |
| O | 11.72663  | 0.81078  | 0.46104  |
| C | 12.11943  | -0.41792 | -0.11227 |
| C | 9.34772   | 0.27661  | 0.31019  |
| C | 10.47568  | 1.27493  | -0.03838 |
| O | 8.88469   | -2.16207 | 0.39551  |
| O | 11.55421  | -2.74297 | -0.18350 |
| C | 10.21654  | 2.65126  | 0.55274  |
| O | 13.40870  | -0.68539 | 0.35547  |
| C | 11.12803  | -1.48914 | 0.33119  |
| C | 9.71824   | -1.14621 | -0.13924 |
| O | 11.07428  | 3.58217  | -0.09590 |
| O | -12.70242 | 0.16385  | -0.48097 |
| O | -9.07237  | 0.71096  | -0.13371 |
| C | -8.66221  | -0.62661 | 0.23453  |
| C | -11.43998 | 0.27730  | 0.15525  |
| C | -10.34106 | 0.79962  | -0.78607 |
| O | -11.97312 | -1.60891 | 1.60811  |
| O | -9.33615  | -2.52203 | 1.55793  |
| C | -10.50712 | 2.27233  | -1.15246 |
| O | -7.42257  | -0.51431 | 0.83855  |
| C | -9.67007  | -1.18754 | 1.23921  |
| C | -11.06891 | -1.12452 | 0.62511  |
| O | -11.78366 | 2.42582  | -1.77621 |
| H | -3.33477  | 0.27470  | 1.29282  |
| H | -6.62723  | -0.08508 | -1.05057 |
| H | -5.12984  | -1.51456 | 1.19688  |
| H | -7.58467  | 1.94741  | 0.28971  |
| H | -4.68416  | 3.36675  | 0.50296  |
| H | -5.40648  | -2.24986 | -1.75517 |
| H | -4.70351  | -3.25146 | -0.46721 |
| H | -4.50183  | 1.66504  | -1.17149 |
| H | -5.70269  | 1.11556  | 1.58150  |
| H | -6.88043  | -3.89046 | -0.77035 |
| H | 1.82827   | -0.23481 | -1.37475 |
| H | -1.18928  | -0.00015 | 1.25287  |
| H | 0.12514   | 1.45311  | -1.11184 |
| H | -2.43329  | -1.92758 | -0.45201 |
| H | 0.38376   | -3.33771 | -0.81156 |
| H | -1.16083  | 2.89971  | 0.47125  |
| H | -0.13797  | 2.29220  | 1.80269  |
| H | 0.73365   | -1.82757 | 0.99728  |
| H | -0.63532  | -0.95468 | -1.59064 |

|   |           |          |          |
|---|-----------|----------|----------|
| H | 0.79192   | 4.21055  | 0.86073  |
| H | 6.97953   | 0.25976  | 1.23704  |
| H | 4.03288   | -0.23961 | -1.46419 |
| H | 5.30149   | -1.46586 | 1.04807  |
| H | 2.79438   | 2.04916  | 0.12504  |
| H | 5.50841   | 3.27817  | 0.32347  |
| H | 4.07863   | -3.03431 | -0.48362 |
| H | 5.17365   | -2.53047 | -1.79960 |
| H | 5.96618   | 1.62297  | -1.30604 |
| H | 4.46740   | 1.00641  | 1.28320  |
| H | 6.07338   | -4.35379 | -0.69939 |
| H | 12.11046  | -0.33117 | -1.21687 |
| H | 9.17860   | 0.27094  | 1.39699  |
| H | 10.51613  | 1.37467  | -1.13511 |
| H | 8.01278   | -2.13244 | -0.03669 |
| H | 10.82280  | -3.35323 | -0.00425 |
| H | 9.15779   | 2.90015  | 0.40395  |
| H | 10.41738  | 2.59910  | 1.63451  |
| H | 13.51244  | -1.64736 | 0.30479  |
| H | 11.13890  | -1.49683 | 1.43258  |
| H | 9.70093   | -1.16178 | -1.24062 |
| H | 10.92197  | 4.44671  | 0.30469  |
| H | -12.86625 | 1.00809  | -0.93266 |
| H | -8.61380  | -1.25481 | -0.66703 |
| H | -11.49184 | 0.94289  | 1.03356  |
| H | -10.34712 | 0.19207  | -1.70468 |
| H | -12.85857 | -1.54276 | 1.22249  |
| H | -10.10792 | -2.87468 | 2.02581  |
| H | -10.43587 | 2.87163  | -0.23322 |
| H | -9.69219  | 2.57438  | -1.82353 |
| H | -9.63725  | -0.53944 | 2.12951  |
| H | -11.08261 | -1.78384 | -0.25917 |
| H | -11.94268 | 3.36520  | -1.92967 |

Hemicellulose  
Energy:

|   |          |          |          |
|---|----------|----------|----------|
| C | 2.75287  | -0.05346 | -0.49459 |
| H | 2.97542  | -0.41632 | -1.50345 |
| C | 2.10152  | 1.33311  | -0.55179 |
| H | 2.72693  | 2.04501  | -1.09537 |
| H | 1.96366  | 1.71298  | 0.47359  |
| O | 0.86659  | 1.27844  | -1.24996 |
| C | -0.11194 | 0.50515  | -0.59551 |
| H | -0.35924 | 0.93055  | 0.39087  |
| C | 0.39200  | -0.94624 | -0.43501 |
| H | 0.41148  | -1.40702 | -1.43044 |
| C | 1.79966  | -1.03065 | 0.18905  |
| H | 1.71255  | -0.73047 | 1.24414  |
| O | -1.21820 | 0.59550  | -1.46073 |
| O | -0.54847 | -1.63248 | 0.41791  |
| C | -0.67584 | -3.01037 | 0.31393  |
| O | 2.30272  | -2.34688 | 0.08159  |
| H | 2.02669  | -2.82463 | 0.88376  |
| O | 3.95883  | 0.00344  | 0.27804  |
| C | -2.47786 | 0.20270  | -0.93242 |
| H | -2.35570 | -0.36102 | -0.00576 |
| C | -3.11444 | -0.71508 | -1.97107 |
| H | -2.49368 | -1.59840 | -2.11796 |
| H | -3.22761 | -0.19517 | -2.93352 |
| O | -4.38022 | -1.17675 | -1.49363 |
| C | -5.29526 | -0.10021 | -1.32214 |
| H | -5.42859 | 0.39794  | -2.29929 |
| C | -4.78685 | 0.92330  | -0.29807 |
| H | -4.76358 | 0.42816  | 0.68296  |
| C | -3.37088 | 1.41558  | -0.63960 |
| H | -3.42789 | 2.04306  | -1.54198 |
| O | -6.49751 | -0.59667 | -0.82645 |
| O | -5.68245 | 2.03530  | -0.28353 |
| O | -2.73335 | 2.10598  | 0.42235  |
| H | -6.56301 | 1.68741  | -0.08036 |
| C | 5.13040  | 0.23273  | -0.44665 |
| H | 5.02859  | 1.12234  | -1.09745 |
| C | 6.24947  | 0.46394  | 0.57141  |
| H | 6.29895  | -0.42970 | 1.21075  |
| O | 5.42060  | -0.90196 | -1.24466 |
| C | 7.57323  | 0.63625  | -0.16307 |
| H | 7.50991  | 1.55092  | -0.77652 |
| C | 6.60998  | -0.73127 | -2.01429 |
| H | 6.52770  | 0.13643  | -2.68795 |

|   |          |          |          |
|---|----------|----------|----------|
| H | 6.72077  | -1.62957 | -2.62425 |
| C | 7.82262  | -0.54506 | -1.09766 |
| H | 7.94205  | -1.44983 | -0.48076 |
| O | 6.03557  | 1.63891  | 1.34254  |
| H | 5.19216  | 1.51835  | 1.80068  |
| O | 8.67529  | 0.72050  | 0.73046  |
| H | 8.47163  | 1.43140  | 1.35461  |
| O | 8.96315  | -0.32772 | -1.90946 |
| H | 9.67281  | -0.05886 | -1.30830 |
| H | -6.88702 | -1.18561 | -1.48791 |
| O | -2.03025 | -3.28378 | -0.11965 |
| C | -0.48393 | -3.66348 | 1.68917  |
| H | 0.03330  | -3.42285 | -0.41691 |
| C | -0.70920 | -5.16362 | 1.57020  |
| C | -2.31349 | -4.67062 | -0.28445 |
| C | -2.09952 | -5.46580 | 1.03237  |
| H | -1.66490 | -5.11485 | -1.05604 |
| C | -3.75932 | -4.88746 | -0.73525 |
| O | -2.16848 | -6.85896 | 0.83142  |
| H | -2.84443 | -5.12365 | 1.76956  |
| H | -2.97760 | -7.02239 | 0.31083  |
| O | -4.17452 | -6.02836 | -0.85076 |
| O | -4.54907 | -3.84809 | -0.95747 |
| H | -4.12981 | -2.97304 | -0.82496 |
| O | -0.49609 | -5.71944 | 2.85920  |
| H | 0.02261  | -5.57366 | 0.85405  |
| H | -1.22668 | -3.22435 | 2.36962  |
| O | 0.83163  | -3.40727 | 2.17120  |
| H | -0.66673 | -6.66975 | 2.78721  |
| H | 0.99352  | -4.06192 | 2.86846  |
| C | -3.26811 | 3.35624  | 0.87623  |
| C | -1.56744 | 4.87713  | 1.14682  |
| C | -2.58312 | 5.58904  | 0.24134  |
| O | -2.33571 | 3.86267  | 1.80014  |
| C | -0.94178 | 5.77330  | 2.20154  |
| H | -0.78011 | 4.43462  | 0.51820  |
| C | -3.44118 | 4.42043  | -0.24749 |
| H | -4.21143 | 3.18422  | 1.40376  |
| O | -1.99536 | 6.29668  | -0.82739 |
| H | -3.22527 | 6.23741  | 0.86002  |
| O | -4.78432 | 4.81503  | -0.42791 |
| H | -2.98826 | 4.05660  | -1.18156 |
| H | -5.29251 | 4.00418  | -0.59112 |
| H | -1.35198 | 6.89573  | -0.41818 |
| H | -1.73657 | 6.15058  | 2.86090  |
| O | -0.29818 | 6.83414  | 1.48962  |

|   |          |         |         |
|---|----------|---------|---------|
| H | -0.22624 | 5.20791 | 2.81499 |
| H | 0.00422  | 7.49329 | 2.12558 |

Lignin  
Energy:

|   |           |          |          |
|---|-----------|----------|----------|
| C | -12.98341 | -6.54505 | 1.94275  |
| C | -12.05938 | -6.01483 | 0.89111  |
| C | -11.46119 | -4.81724 | 0.95605  |
| C | -10.51204 | -4.23175 | -0.00163 |
| C | -10.05280 | -2.92713 | 0.23404  |
| C | -9.14861  | -2.31105 | -0.63812 |
| O | -8.64783  | -1.05588 | -0.46043 |
| C | -9.17097  | -0.27535 | 0.61017  |
| C | -8.70439  | -2.99617 | -1.78680 |
| C | -9.16579  | -4.31100 | -2.02050 |
| O | -8.68026  | -4.89903 | -3.15332 |
| C | -9.12001  | -6.21181 | -3.46485 |
| C | -10.05542 | -4.92244 | -1.13577 |
| O | -14.18941 | -6.97432 | 1.31090  |
| O | -7.75900  | -2.48801 | -2.63609 |
| C | 0.30844   | 1.26665  | -3.50983 |
| C | 1.10097   | 2.29477  | -2.98886 |
| C | 2.27950   | 2.62462  | -3.65462 |
| C | 2.67638   | 1.94260  | -4.79538 |
| C | 1.89794   | 0.90859  | -5.33514 |
| C | 0.69970   | 0.59920  | -4.68390 |
| O | 3.86616   | 2.36351  | -5.31763 |
| O | 2.37976   | 0.28339  | -6.44736 |
| C | -0.96827  | 0.83515  | -2.79795 |
| C | -0.72881  | -0.32778 | -1.80863 |
| O | -1.42143  | 2.01840  | -2.11697 |
| C | 0.12692   | -1.47524 | -2.35557 |
| O | -0.38382  | -2.04445 | -3.54937 |
| O | -1.96761  | -0.87825 | -1.26114 |
| C | -5.50878  | -1.04571 | -3.48818 |
| C | -4.70203  | -2.18126 | -3.36510 |
| C | -3.51094  | -2.12605 | -2.64085 |
| C | -3.10298  | -0.91856 | -2.03638 |
| C | -3.93469  | 0.20761  | -2.11694 |
| C | -5.12070  | 0.13684  | -2.86296 |
| C | -4.57936  | 2.84641  | 0.48271  |
| C | -4.69518  | 1.76582  | -0.37913 |
| C | -3.66878  | 1.40377  | -1.27528 |
| C | -2.48142  | 2.14535  | -1.27357 |

|   |           |          |          |
|---|-----------|----------|----------|
| C | -2.34946  | 3.24086  | -0.37193 |
| C | -3.39024  | 3.58986  | 0.48303  |
| O | -2.67761  | -3.20473 | -2.46816 |
| C | -3.17174  | -4.50187 | -2.81433 |
| C | -6.79852  | -1.10111 | -4.28899 |
| C | -8.05431  | -1.31365 | -3.41939 |
| C | -9.30271  | -1.49127 | -4.29087 |
| O | -10.52351 | -1.35968 | -3.57656 |
| C | -5.74343  | 3.22383  | 1.35900  |
| C | -6.69616  | 4.30009  | 0.77598  |
| C | -7.86823  | 3.73304  | -0.01655 |
| O | -8.80180  | 3.30831  | 0.98278  |
| O | -1.15385  | 3.89853  | -0.42888 |
| C | -0.95306  | 4.98837  | 0.45709  |
| C | 5.67489   | 2.74686  | -3.70788 |
| C | 6.44279   | 3.58751  | -2.90482 |
| C | 7.49969   | 3.07094  | -2.16370 |
| C | 7.86467   | 1.71712  | -2.24512 |
| C | 7.11367   | 0.88787  | -3.11342 |
| C | 6.01642   | 1.39827  | -3.81140 |
| O | 8.99110   | 1.33191  | -1.56918 |
| O | 7.53298   | -0.40695 | -3.24676 |
| C | 4.44552   | 3.32069  | -4.38585 |
| C | 3.31038   | 3.69198  | -3.37030 |
| C | 2.76218   | 5.10282  | -3.58037 |
| O | 3.79649   | 6.02620  | -3.23533 |
| C | 1.63333   | -0.81374 | -6.95509 |
| C | 6.60534   | -1.39442 | -3.69805 |
| C | 9.54350   | 0.93898  | 4.46630  |
| C | 8.13388   | 1.51268  | 4.62350  |
| C | 8.03631   | 3.01344  | 4.26420  |
| C | 8.11354   | 3.34686  | 2.78103  |
| C | 6.94918   | 3.64629  | 2.07148  |
| C | 7.00970   | 3.89406  | 0.70501  |
| O | 5.84183   | 4.19707  | 0.03512  |
| C | 5.67434   | 5.59926  | -0.20373 |
| C | 8.21969   | 3.79367  | -0.00651 |
| C | 9.40899   | 3.57681  | 0.71818  |
| O | 10.66601  | 3.48653  | 0.20425  |
| C | 10.99201  | 4.00934  | -1.08822 |
| C | 9.33523   | 3.37794  | 2.10702  |
| O | 9.70510   | -0.30156 | 5.12623  |
| O | 8.23798   | 3.96704  | -1.38198 |
| C | 1.91632   | -3.64154 | 6.58777  |
| C | 2.04502   | -2.89657 | 5.25185  |
| C | 2.18717   | -1.34190 | 5.42676  |



|   |          |          |          |
|---|----------|----------|----------|
| C | 3.52863  | -0.76819 | 5.00884  |
| C | 4.64761  | -1.02110 | 5.80971  |
| C | 5.89876  | -0.53669 | 5.42263  |
| O | 7.06194  | -0.79908 | 6.09842  |
| C | 7.00137  | -1.50818 | 7.32822  |
| C | 6.04423  | 0.25487  | 4.26791  |
| C | 4.91160  | 0.47724  | 3.46523  |
| O | 5.13412  | 1.18695  | 2.32078  |
| C | 4.04192  | 1.43689  | 1.43692  |
| C | 3.65980  | -0.02741 | 3.83614  |
| O | 3.08228  | -3.53373 | 7.40068  |
| O | 7.27182  | 0.67647  | 3.80948  |
| O | 6.82607  | 3.46865  | 4.86341  |
| C | -1.97321 | -6.56987 | 0.35845  |
| C | -1.11881 | -5.49044 | 1.01511  |
| C | -1.67233 | -5.10965 | 2.41289  |
| C | -0.96075 | -3.92712 | 3.04625  |
| C | -1.40036 | -2.62161 | 2.75482  |
| C | -0.74689 | -1.49723 | 3.27325  |
| O | -1.09386 | -0.20268 | 3.05407  |
| C | -2.24059 | 0.04854  | 2.24298  |
| C | 0.37156  | -1.72758 | 4.09125  |
| O | 1.11686  | -0.73270 | 4.65180  |
| C | 0.81266  | -3.00973 | 4.38178  |
| C | 0.14865  | -4.12515 | 3.87326  |
| O | -1.46596 | -6.79872 | -0.95934 |
| O | -7.03706 | 0.11537  | -4.99613 |
| C | 7.59950  | -3.31712 | -0.19707 |
| C | 6.32382  | -4.09936 | -0.23005 |
| C | 5.14537  | -3.54206 | 0.08855  |
| C | 3.84865  | -4.20529 | 0.27075  |
| C | 3.70514  | -5.60083 | 0.38354  |
| C | 2.47354  | -6.18632 | 0.64160  |
| O | 2.40432  | -7.55083 | 0.81771  |
| C | 1.79750  | -8.25655 | -0.26800 |
| C | 1.32350  | -5.38152 | 0.81052  |
| O | 0.18656  | -6.04920 | 1.18154  |
| C | 1.44458  | -3.99776 | 0.67079  |
| C | 2.69024  | -3.42740 | 0.40668  |
| O | 8.29987  | -3.41409 | -1.44040 |
| O | -3.06786 | -4.86200 | 2.23093  |
| C | -6.46099 | 4.35893  | 3.19991  |
| C | -7.36128 | 4.88660  | 2.05072  |
| C | -8.81104 | 4.31567  | 2.00988  |
| C | -9.89484 | 5.36212  | 1.76596  |
| C | -9.95407 | 6.51813  | 2.54554  |

|   |           |          |          |
|---|-----------|----------|----------|
| C | -10.97042 | 7.46331  | 2.36839  |
| O | -10.92619 | 8.60637  | 3.12641  |
| C | -12.08241 | 8.89559  | 3.91883  |
| C | -11.94492 | 7.25290  | 1.38486  |
| C | -11.89645 | 6.07388  | 0.61949  |
| C | -10.88802 | 5.13230  | 0.80467  |
| O | -5.30427  | 3.78910  | 2.59270  |
| O | -12.92360 | 8.17802  | 1.15838  |
| O | -12.91522 | 5.98655  | -0.30102 |
| C | -12.94222 | 4.85966  | -1.16673 |
| C | 8.46854   | 0.13525  | 0.50229  |
| C | 9.06972   | 0.05722  | -0.89476 |
| C | 10.55861  | -0.33130 | -0.83410 |
| C | 11.36130  | -0.08721 | -2.09274 |
| C | 10.93269  | -0.55386 | -3.34699 |
| C | 11.71814  | -0.38602 | -4.47981 |
| C | 12.96109  | 0.25328  | -4.38119 |
| C | 13.40323  | 0.72479  | -3.14324 |
| C | 12.60254  | 0.55015  | -2.01284 |
| O | 7.05604   | 0.19285  | 0.38581  |
| O | 13.69210  | 0.38720  | -5.52862 |
| O | 10.53745  | -1.74249 | -0.50350 |
| H | -12.49894 | -7.39260 | 2.45907  |
| H | -13.17372 | -5.76980 | 2.70204  |
| H | -11.89138 | -6.68680 | 0.05179  |
| H | -11.69086 | -4.18200 | 1.81186  |
| H | -10.40354 | -2.40063 | 1.11296  |
| H | -8.71415  | 0.71109  | 0.53491  |
| H | -10.25922 | -0.16842 | 0.53040  |
| H | -8.92146  | -0.71554 | 1.58354  |
| H | -8.62556  | -6.47795 | -4.40025 |
| H | -8.83279  | -6.93144 | -2.68766 |
| H | -10.20732 | -6.25416 | -3.60734 |
| H | -10.39900 | -5.93035 | -1.32493 |
| H | -14.70530 | -7.46356 | 1.96471  |
| H | 0.78155   | 2.82698  | -2.10068 |
| H | 0.08330   | -0.21377 | -5.04556 |
| H | -1.70566  | 0.52589  | -3.54471 |
| H | -0.21524  | 0.08966  | -0.93457 |
| H | 0.21696   | -2.22865 | -1.56234 |
| H | 1.12965   | -1.09916 | -2.57281 |
| H | -1.11243  | -2.63020 | -3.28257 |
| H | -5.01903  | -3.10637 | -3.83103 |
| H | -5.75033  | 1.01609  | -2.94548 |
| H | -5.58947  | 1.15019  | -0.35865 |
| H | -3.29146  | 4.41502  | 1.17617  |

|   |           |          |          |
|---|-----------|----------|----------|
| H | -2.44466  | -5.21313 | -2.42002 |
| H | -4.14843  | -4.67592 | -2.34996 |
| H | -3.26288  | -4.61692 | -3.90139 |
| H | -6.73659  | -1.94991 | -4.98955 |
| H | -8.19051  | -0.44965 | -2.76140 |
| H | -9.30154  | -0.70087 | -5.04498 |
| H | -9.23259  | -2.46174 | -4.80607 |
| H | -10.60196 | -2.12204 | -2.98818 |
| H | -6.34327  | 2.31961  | 1.56036  |
| H | -6.12238  | 5.04209  | 0.21478  |
| H | -7.61294  | 2.86091  | -0.62547 |
| H | -8.31542  | 4.49633  | -0.66882 |
| H | 0.05431   | 5.35557  | 0.25574  |
| H | -1.67447  | 5.79569  | 0.27696  |
| H | -1.02096  | 4.67657  | 1.50696  |
| H | 6.20048   | 4.63956  | -2.81061 |
| H | 5.44239   | 0.75716  | -4.46750 |
| H | 4.72797   | 4.19750  | -4.97719 |
| H | 3.69568   | 3.63242  | -2.34706 |
| H | 1.87292   | 5.24857  | -2.94939 |
| H | 2.45147   | 5.22679  | -4.62862 |
| H | 3.51078   | 6.91278  | -3.48872 |
| H | 2.21558   | -1.21198 | -7.78733 |
| H | 1.49241   | -1.59337 | -6.19639 |
| H | 0.64908   | -0.49543 | -7.32322 |
| H | 7.04303   | -2.35152 | -3.41168 |
| H | 5.63653   | -1.27729 | -3.20092 |
| H | 6.46498   | -1.34168 | -4.78463 |
| H | 9.76939   | 0.85519  | 3.39273  |
| H | 10.27079  | 1.63102  | 4.90687  |
| H | 7.83442   | 1.43120  | 5.67140  |
| H | 8.89794   | 3.48465  | 4.76796  |
| H | 5.98472   | 3.64972  | 2.56095  |
| H | 5.50683   | 6.13551  | 0.74000  |
| H | 6.55407   | 6.02073  | -0.70279 |
| H | 4.80909   | 5.71293  | -0.85882 |
| H | 12.08351  | 4.05693  | -1.10457 |
| H | 10.63760  | 3.35214  | -1.88217 |
| H | 10.58121  | 5.01322  | -1.22846 |
| H | 10.27287  | 3.20736  | 2.62675  |
| H | 8.86656   | -0.77794 | 5.03306  |
| H | 1.66505   | -4.69537 | 6.39912  |
| H | 1.09945   | -3.21143 | 7.17602  |
| H | 2.92158   | -3.29250 | 4.72069  |
| H | 2.00082   | -1.07810 | 6.47500  |
| H | 4.53174   | -1.61219 | 6.71041  |

|   |           |          |          |
|---|-----------|----------|----------|
| H | 8.02934   | -1.55320 | 7.68933  |
| H | 6.37466   | -0.98565 | 8.05987  |
| H | 6.61781   | -2.52630 | 7.18769  |
| H | 4.45398   | 2.04329  | 0.63105  |
| H | 3.63698   | 0.50136  | 1.03413  |
| H | 3.24349   | 1.99021  | 1.94409  |
| H | 2.78219   | 0.16000  | 3.23386  |
| H | 3.79706   | -3.99588 | 6.94191  |
| H | 6.71027   | 4.39635  | 4.61724  |
| H | -1.90947  | -7.48268 | 0.96722  |
| H | -3.01549  | -6.23554 | 0.33281  |
| H | -1.09533  | -4.61165 | 0.36194  |
| H | -1.51949  | -5.99415 | 3.05172  |
| H | -2.25773  | -2.49806 | 2.10409  |
| H | -2.35357  | 1.13202  | 2.20886  |
| H | -2.11108  | -0.33636 | 1.22537  |
| H | -3.14227  | -0.39252 | 2.68648  |
| H | 0.49775   | -5.13140 | 4.08484  |
| H | -1.87050  | -7.60846 | -1.29476 |
| H | -6.23087  | 0.32970  | -5.48388 |
| H | 7.36358   | -2.27518 | 0.05040  |
| H | 8.23334   | -3.71331 | 0.61592  |
| H | 6.40557   | -5.15965 | -0.46598 |
| H | 5.13846   | -2.46662 | 0.26999  |
| H | 4.56366   | -6.25987 | 0.30714  |
| H | 2.41199   | -8.17829 | -1.17516 |
| H | 1.74612   | -9.30425 | 0.03840  |
| H | 0.79122   | -7.88177 | -0.48036 |
| H | 0.58815   | -3.35345 | 0.82712  |
| H | 2.76694   | -2.34585 | 0.33339  |
| H | 9.14484   | -2.95171 | -1.29915 |
| H | -3.39926  | -4.48057 | 3.05493  |
| H | -6.12472  | 5.14280  | 3.88393  |
| H | -6.99383  | 3.59449  | 3.78757  |
| H | -7.37763  | 5.97721  | 2.03395  |
| H | -9.04266  | 3.78143  | 2.94017  |
| H | -9.21776  | 6.72422  | 3.31625  |
| H | -11.82893 | 9.78132  | 4.50469  |
| H | -12.95774 | 9.10169  | 3.29806  |
| H | -12.30526 | 8.06474  | 4.60070  |
| H | -10.85204 | 4.22071  | 0.22281  |
| H | -13.47440 | 7.82390  | 0.44228  |
| H | -13.80462 | 4.99887  | -1.81973 |
| H | -12.03065 | 4.80157  | -1.77318 |
| H | -13.05955 | 3.92644  | -0.60325 |
| H | 8.79299   | -0.75499 | 1.06180  |

|   |          |          |          |
|---|----------|----------|----------|
| H | 8.86486  | 1.01736  | 1.01417  |
| H | 8.54139  | -0.69966 | -1.46999 |
| H | 11.03573 | 0.22177  | -0.01156 |
| H | 9.96206  | -1.02912 | -3.44005 |
| H | 11.38637 | -0.73692 | -5.45132 |
| H | 14.36658 | 1.22418  | -3.06077 |
| H | 12.95182 | 0.92326  | -1.05308 |
| H | 6.68898  | 0.53641  | 1.21693  |
| H | 14.51403 | 0.85266  | -5.32537 |
| H | 11.45051 | -2.05820 | -0.53075 |
